# Supplementary material for: Multiple gene variations contributed to congenital heart disease via GATA family transcriptional regulation
Source: J Transl Med. 2017 Apr 3;15:69. doi: 10.1186/s12967-017-1173-0 (PMC5379520; doi:10.1186/s12967-017-1173-0)
Supplement: Supplementary file 1 — Additional file 1: Table S1. Patients’ clinical characteristics. [file 12967_2017_1173_MOESM1_ESM.xlsx]

## Sheet: Sheet1
Table S1: Patients’ clinical characteristics
sample ID	gender	age(months)	diagosis
A0608	female	3	TOF
A0750/B387	female	24	TOF/PFO
B523	female	8	TOF/PFO
A1106/B589	female	3	TOF/PFO
A1114	male	36	TOF/PDA/PFO
A1234/B648	male	5	TOF
A1247	male	6	TOF/PFO
B012	male	13	TOF
B151	male	10	TOF/PFO
B263	female	216	TOF
B273	male	6	TOF/PFO
B280	male	36	TOF
B285	female	6	TOF
B287	male	4	TOF/ASD/PFO/LSVC
B292	female	8	TOF
B293	male	12	TOF/PAA/PFO
B294	male	24	TOF
B297	female	6	TOF/ASD
B300	male	2	TOF/PFO
B301	female	8	TOF/PFO
B302	male	6	TOF/ASD
B303	female	6	TOF/PAA
B305	female	5	TOF/PDA/PFO
B308	female	84	TOF/ASD
B311	male	120	TOF
B313	female	12	TOF
B314	male	5	TOF/PFO
B319/B329	male	12	TOF
B321	male	6	TOF
B325	male	6	TOF/PFO/LSVC
B326/B330	female	72	TOF/AVSD
B335/B342	male	12	TOF
B336/B533	male	8	TOF/PAA/ASD/LSVC
B341	male	24	TOF
B342	male	12	TOF
B344	female	5	TOF/PFO
B346	male	5	TOF/PDA/PFO
B349	male	10	TOF/PFO
B350	female	36	TOF
B352/B370	female	24	TOF/AVSD/PDA/LSVC
B354	male	7	TOF
B355	male	7	TOF
B357	male	8	TOF/PFO
B372	male	12	TOF
B376	male	6	TOF/PDA/PFO
B384/B388	female	60	TOF/PFO
B385	male	9	TOF/LSVC
B393	female	11	TOF
B394	female	12	TOF
B397	female	144	TOF/ASD
B398	male	12	TOF/PFO/LSVC
B399	male	2	TOF
B407/B428	male	4	TOF/ASD/PDA
B413	female	8	TOF
B427	male	24	TOF
B430	male	12	TOF/PFO
B431	male	7	TOF/ASD
B445	male	12	TOF/PFO
B446	female	12	TOF/PFO
B451	male	8	TOF/PDA
B460	male	6	TOF
B462	male	48	TOF
B464	male	6	TOF/PFO
B470	female	6	TOF/LSVC
B471	female	2	TOF/PFO
B481	male	48	TOF/AVSD
B482	male	4	TOF/PFO
B483	female	3	TOF/PFO
B492	male	3	TOF/PFO
B495	male	5	TOF/PFO
B501	male	36	TOF/RSAA/TR
B505	female	10	TOF/PFO/LSVC
B513	male	2	TOF/PFO/LSVC
B514	male	36	TOF/PFO
B515	male	5	TOF/PFO
B524	male	132	TOF
B528	female	5	TOF/PDA/PFO
B529	female	36	TOF
B530	male	48	TOF
B535	male	5	TOF/PDA/PFO
B537	female	5	TOF/ASD/PFO
B542	male	60	TOF
B544	male	3	TOF/PDA/PFO
B545	female	12	TOF/PFO
B546	male	19	TOF
B548	male	8	TOF/PFO
B549	male	5	TOF/ASD/PFO
B551	female	9	TOF
B557	male	3	TOF/VSD/PFO/PDA
B558	female	8	TOF
B572	female	3	TOF/PFO
B573	female	9	TOF
B581	female	2	TOF/ASD/PDA
B582	male	12	TOF
B594	male	4	TOF/PFO/RSAA/LSVC
B601	male	1	TOF
B604	male	6	TOF/PAA/PDA/PFO,LSVC
B619	female	8	TOF
B624	male	10	TOF
B632	female	9	TOF
B634	male	9	TOF/PFO
B642	female	3	TOF/PDA/PFO
B655	female	3	TOF/ASD
B657	male	6	TOF/PFO
B662	female	5	TOF/PFO/LSVC
B663	male	10	TOF
